# Supplementary material for: Unraveling the Formation Mechanism of Egg’s Unique Flavor via Flavoromics and Lipidomics
Source: MDPI journal article supplement (doi:10.3390/foods13020226), 2024-01-10
Supplement: s1 [file s1]

**Supporting information for:**

**Unraveling the Formation Mechanism of Egg Unique Flavor via Flavoromics and Lipidomics**

Zheng Zhou, Shuang Cui, Jing Che, Yu-Ying Zhang, Dayong Zhou, Xuhui Huang\*, Lei Qin\*

State Key Laboratory of Marine Food Processing & Safety Control, School of Food Science and Technology, National Engineering Research Center of Seafood, Dalian Polytechnic University, Dalian 116034, China

**\*Corresponding Author**

Xuhui Huang

E-mail: xuhuisos@dlpu.edu.cn

Lei Qin

Phone: +86-411-86323262

E-mail: qinlei@dlpu.edu.cn

**Table S1.** 10 electronic nose sensors and their corresponding compound types.

| Semiconductors | Compounds                              |
|----------------|----------------------------------------|
| W1C            | aromatic compounds                     |
| W1S            | methane, broad range of compounds      |
| W1W            | sulfur compounds, terpenes             |
| W2S            | broad range, alcohols                  |
| W2W            | aromatics and organic sulfur compounds |
| W3C            | ammonia, aromatic compounds            |
| W3S            | methane and aliphatic compounds        |
| W5C            | alkanes and aromatics                  |
| W5S            | broad range                            |
| W6S            | hydrocarbons                           |

**Table S2.** Retention Time, Compound Name, Matching Scores, Reverse Matching Scores, Molecular Formula, Detection Method of 68 volatile compounds generated from egg yolks during thermal treatment.

| No. | Retention Time (min) | Compound Name                                | Matching Scores | Reverse Matching Scores | Molecular Formula | Detection Method |
|-----|----------------------|----------------------------------------------|-----------------|-------------------------|-------------------|------------------|
| 1   | 2.3237               | n-Hexane                                     | 969             | 971                     | C6H14             | GC-MS            |
| 2   | 2.3237               | 2-Ethyl-oxetane                              | 816             | 921                     | C5H10O            | GC-MS            |
| 3   | 4.489917             | Pyrazine                                     | 697             | 797                     | C4H4N2            | GC-MS            |
| 4   | 5.046183             | Toluene                                      | 704             | 790                     | C7H8              | GC-MS            |
| 5   | 5.923367             | Hexanal                                      | 942             | 954                     | C6H12O            | GC-MS+GC-O-MS    |
| 6   | 6.757767             | Methyl-pyrazine                              | 859             | 890                     | C5H6N2            | GC-MS+GC-O-MS    |
| 7   | 7.982617             | p-Xylene                                     | 707             | 818                     | C8H10             | GC-MS            |
| 8   | 7.982617             | 1,3-Dimethyl-benzene                         | 703             | 825                     | C8H10             | GC-MS            |
| 9   | 9.282367             | 1-Methoxy-cyclohexene                        | 863             | 875                     | C7H12O            | GC-MS            |
| 10  | 9.31445              | 2,5-Dimethyl-pyrazine                        | 924             | 953                     | C6H8N2            | GC-MS            |
| 11  | 9.421417             | 2-Amino-4-methyl-benzoic acid                | 549             | 549                     | C8H9NO2           | GC-MS            |
| 12  | 10.64628             | (Z)-2-heptenal                               | 661             | 794                     | C7H12O            | GC-MS            |
| 13  | 10.65163             | 2,4-Hexadien-1-ol                            | 599             | 709                     | C6H10O            | GC-MS            |
| 14  | 10.91907             | N-Acetylpyrrole                              | 939             | 939                     | C6H7NO            | GC-MS            |
| 15  | 10.96185             | Benzaldehyde                                 | 887             | 887                     | C7H6O             | GC-MS            |
| 16  | 11.64113             | 2-Ethyl-hexanal                              | 667             | 725                     | C8H16O            | GC-MS            |
| 17  | 11.7909              | 6-Methyl-5-Hepten-2-one                      | 527             | 715                     | C8H14O            | GC-MS            |
| 18  | 11.9674              | 2-Pentyl-furan                               | 818             | 901                     | C9H14O            | GC-MS            |
| 19  | 12.22415             | 2-Ethyl-5-methyl-pyrazine                    | 648             | 648                     | C7H10N2           | GC-MS            |
| 20  | 12.25088             | Trimethyl-pyrazine                           | 909             | 909                     | C7H10N2           | GC-MS+GC-O-MS    |
| 21  | 12.66808             | 2-Hexen-1-ol, acetate, (E)-                  | 616             | 649                     | C8H14O2           | GC-MS            |
| 22  | 12.86063             | 2-Ethyl-3-methyl-pyrazine                    | 635             | 734                     | C7H10N2           | GC-MS            |
| 23  | 13.09598             | (S)-1-methyl-4-(1-methylethenyl)-cyclohexene | 693             | 831                     | C10H16            | GC-MS            |
| 24  | 13.19227             | Butyl-cyclohexane                            | 744             | 809                     | C10H20            | GC-MS            |

|    |          |                                                                    |     |     |          |               |
|----|----------|--------------------------------------------------------------------|-----|-----|----------|---------------|
| 25 | 13.2083  | 3-Ethyl-2-methyl-1,3-hexadiene                                     | 556 | 638 | C9H16    | GC-MS         |
| 26 | 13.63085 | Benzeneacetaldehyde                                                | 751 | 753 | C8H8O    | GC-MS+GC-O-MS |
| 27 | 13.91968 | Levogluconone                                                      | 557 | 619 | C6H6O3   | GC-MS         |
| 28 | 13.63085 | N-methyl-benzenemethanamine                                        | 579 | 650 | C8H11N   | GC-MS         |
| 29 | 14.21387 | 2-Methylpropyl ester 3-methyl-2-butenic acid                       | 579 | 736 | C9H16O2  | GC-MS         |
| 30 | 14.0427  | 2-Butyl-4,5-dimethyloxazole                                        | 567 | 567 | C9H15NO  | GC-MS         |
| 31 | 14.71665 | 3-Ethyl-2,5-dimethyl-pyrazine                                      | 953 | 959 | C8H12N2  | GC-MS         |
| 32 | 14.8878  | 2-Ethyl-3,5-dimethyl-pyrazine                                      | 789 | 803 | C8H12N2  | GC-MS         |
| 33 | 14.8878  | 4-Ethyl-1,2-dimethyl-benzene                                       | 544 | 583 | C10H14   | GC-MS         |
| 34 | 14.95733 | 2,3-Dimethyl-5-ethylpyrazine                                       | 881 | 928 | C8H12N2  | GC-MS         |
| 35 | 15.17128 | 2-Undecanone                                                       | 848 | 963 | C11H22O  | GC-MS         |
| 36 | 15.51895 | 1,3-Cyclohexanediol                                                | 535 | 648 | C6H12O2  | GC-MS         |
| 37 | 15.36383 | (E)-2-methyl-6-(1-propenyl)-pyrazine                               | 806 | 806 | C8H10N2  | GC-MS         |
| 38 | 15.5136  | Nonanal                                                            | 934 | 934 | C9H18O   | GC-MS         |
| 39 | 16.27847 | N,4-dimethyl-benzenamine                                           | 577 | 720 | C8H11N   | GC-MS         |
| 40 | 16.46567 | Pentyl-cyclohexane                                                 | 698 | 799 | C11H22   | GC-MS         |
| 41 | 16.58868 | 5H-5-Methyl-6,7-dihydrocyclopentapyrazine                          | 918 | 918 | C8H10N2  | GC-MS         |
| 42 | 16.77055 | N-cyclopentylidene-ethanamine                                      | 816 | 897 | C7H13N   | GC-MS         |
| 43 | 17.04333 | 2,3-Diethyl-5-methyl-pyrazine                                      | 741 | 801 | C9H14N2  | GC-MS         |
| 44 | 17.41773 | 3,5-Diethyl-2-methyl-pyrazine                                      | 730 | 850 | C9H14N2  | GC-MS         |
| 45 | 18.25213 | 2-Decanone                                                         | 583 | 784 | C10H20O  | GC-MS         |
| 46 | 18.34842 | Dodecane                                                           | 686 | 788 | C12H26   | GC-MS         |
| 47 | 18.34842 | 2-Octen-2-ol, acetate                                              | 660 | 824 | C10H18O2 | GC-MS         |
| 48 | 18.5891  | 2,6-Dimethyl-3,7-octadiene-2,6-diol                                | 566 | 611 | C10H18O2 | GC-MS         |
| 49 | 19.0277  | 4-(1-Methylethyl)-benzaldehyde                                     | 631 | 683 | C10H12O  | GC-MS         |
| 50 | 19.2149  | Decanal                                                            | 550 | 603 | C10H20O  | GC-MS         |
| 51 | 21.08695 | (-)-Norephedrine                                                   | 533 | 596 | C9H13NO  | GC-MS         |
| 52 | 21.60042 | 2,5-Dimethyl-3-(3-methylbutyl)-pyrazine                            | 692 | 734 | C11H18N2 | GC-MS         |
| 53 | 22.67552 | 2,3-Dihydro-1,1,4,5-tetramethyl-1H-Indene                          | 618 | 695 | C13H18   | GC-MS         |
| 54 | 28.58583 | Pentanoic acid, 2,2,4-trimethyl-3-carboxyisopropyl, isobutyl ester | 585 | 688 | C16H30O4 | GC-MS         |
| 55 | 47.3063  | Cholesterol                                                        | 926 | 930 | C27H46O  | GC-MS         |

|    |        |                              |     |     |          |         |
|----|--------|------------------------------|-----|-----|----------|---------|
| 56 | 2.25   | Pentane                      | 902 | 902 | C5H12    | GC-O-MS |
| 57 | 2.436  | 2-Methoxy-2-methyl-propane   | 865 | 876 | C5H12O   | GC-O-MS |
| 58 | 2.488  | Heptane                      | 929 | 929 | C7H16    | GC-O-MS |
| 59 | 2.85   | 2-Butanone                   | 876 | 920 | C4H8O    | GC-O-MS |
| 60 | 3.578  | 3-Methyl-butanal             | 910 | 914 | C5H10O   | GC-O-MS |
| 61 | 6.8    | 1-Benzylindole               | 714 | 714 | C15H13N  | GC-O-MS |
| 62 | 10.566 | (R)-3-hydroxy-nonanal        | 753 | 962 | C9H18O2  | GC-O-MS |
| 63 | 14.844 | Bis(1-methylpropyl)disulfide | 511 | 648 | C8H18S2  | GC-O-MS |
| 64 | 15.51  | 2,5-Diethyl-pyrazine         | 478 | 665 | C8H12N2  | GC-O-MS |
| 65 | 22.503 | Dimethyl sulfone             | 706 | 910 | C2H6O2S  | GC-O-MS |
| 66 | 22.7   | p-Mentha-1(7),2-dien-8-ol    | 424 | 774 | C10H16O  | GC-O-MS |
| 67 | 24.56  | Pantolactone                 | 924 | 947 | C6H10O3  | GC-O-MS |
| 68 | 27.628 | 7-Hexyl-2-oxepanone          | 509 | 606 | C12H22O2 | GC-O-MS |

**Table S3.** Compound name, average m/z, average retention time (min), formula, adduct type of lipid molecular species in egg yolks.

| No. | Metabolite name        | Average m/z | Average Rt(min) | Formula                                           | Adduct type                       |
|-----|------------------------|-------------|-----------------|---------------------------------------------------|-----------------------------------|
| 1   | CAR 18:1               | 426.3578    | 1.633           | C <sub>25</sub> H <sub>48</sub> NO <sub>4</sub>   | [M] <sup>+</sup>                  |
| 2   | Cer 18:1;2O/16:0       | 536.5063    | 5.847           | C <sub>34</sub> H <sub>67</sub> NO <sub>3</sub>   | [M-H] <sup>-</sup>                |
| 3   | Cer 18:1;2O/22:0       | 620.5989    | 7.932           | C <sub>40</sub> H <sub>79</sub> NO <sub>3</sub>   | [M-H] <sup>-</sup>                |
| 4   | Cer 18:1;2O/22:0;(2OH) | 636.5947    | 7.605           | C <sub>40</sub> H <sub>79</sub> NO <sub>4</sub>   | [M-H] <sup>-</sup>                |
| 5   | Cer 18:1;2O/23:0       | 634.6143    | 8.257           | C <sub>41</sub> H <sub>81</sub> NO <sub>3</sub>   | [M-H] <sup>-</sup>                |
| 6   | Cer 18:1;2O/24:0       | 648.6301    | 8.57            | C <sub>42</sub> H <sub>83</sub> NO <sub>3</sub>   | [M-H] <sup>-</sup>                |
| 7   | Cer 18:1;2O/24:0;(2OH) | 664.6264    | 8.259           | C <sub>42</sub> H <sub>83</sub> NO <sub>4</sub>   | [M-H] <sup>-</sup>                |
| 8   | Cer 18:1;2O/24:1       | 646.6134    | 7.902           | C <sub>42</sub> H <sub>81</sub> NO <sub>3</sub>   | [M-H] <sup>-</sup>                |
| 9   | DG 18:1_18:2           | 636.5565    | 6.655           | C <sub>39</sub> H <sub>70</sub> O <sub>5</sub>    | [M+NH <sub>4</sub> ] <sup>+</sup> |
| 10  | FA 18:1                | 281.2492    | 3.209           | C <sub>18</sub> H <sub>34</sub> O <sub>2</sub>    | [M-H] <sup>-</sup>                |
| 11  | FA 18:2                | 279.2324    | 5.285           | C <sub>18</sub> H <sub>32</sub> O <sub>2</sub>    | [M-H] <sup>-</sup>                |
| 12  | FA 20:4                | 303.234     | 2.479           | C <sub>20</sub> H <sub>32</sub> O <sub>2</sub>    | [M-H] <sup>-</sup>                |
| 13  | FA 22:5                | 329.2485    | 2.842           | C <sub>22</sub> H <sub>34</sub> O <sub>2</sub>    | [M-H] <sup>-</sup>                |
| 14  | FA 22:6                | 327.2328    | 2.262           | C <sub>22</sub> H <sub>32</sub> O <sub>2</sub>    | [M-H] <sup>-</sup>                |
| 15  | LNAPE 16:0/N-18:0      | 718.5391    | 5.716           | C <sub>39</sub> H <sub>78</sub> NO <sub>8</sub> P | [M-H] <sup>-</sup>                |
| 16  | LNAPE 18:1/N-18:0      | 744.5537    | 5.787           | C <sub>41</sub> H <sub>80</sub> NO <sub>8</sub> P | [M-H] <sup>-</sup>                |
| 17  | LNAPE 18:2/N-18:0      | 742.5411    | 5.285           | C <sub>41</sub> H <sub>78</sub> NO <sub>8</sub> P | [M-H] <sup>-</sup>                |
| 18  | LNAPE 18:1/N-20:0      | 772.59      | 6.463           | C <sub>43</sub> H <sub>84</sub> NO <sub>8</sub> P | [M-H] <sup>-</sup>                |
| 19  | LNAPE 18:2/N-20:0      | 770.5706    | 5.944           | C <sub>43</sub> H <sub>82</sub> NO <sub>8</sub> P | [M-H] <sup>-</sup>                |
| 20  | LNAPE 18:1/N-20:2      | 768.5582    | 5.355           | C <sub>43</sub> H <sub>80</sub> NO <sub>8</sub> P | [M-H] <sup>-</sup>                |
| 21  | LNAPE 20:4/N-18:0      | 766.5388    | 5.187           | C <sub>43</sub> H <sub>78</sub> NO <sub>8</sub> P | [M-H] <sup>-</sup>                |
| 22  | LNAPE 20:4/N-20:0      | 794.5746    | 5.839           | C <sub>45</sub> H <sub>82</sub> NO <sub>8</sub> P | [M-H] <sup>-</sup>                |
| 23  | LNAPE 20:4/N-20:1      | 792.5589    | 5.236           | C <sub>45</sub> H <sub>80</sub> NO <sub>8</sub> P | [M-H] <sup>-</sup>                |
| 24  | LNAPE 22:5/N-18:0      | 792.5579    | 5.442           | C <sub>45</sub> H <sub>80</sub> NO <sub>8</sub> P | [M-H] <sup>-</sup>                |
| 25  | LNAPE 22:6/N-18:0      | 790.5385    | 5.02            | C <sub>45</sub> H <sub>78</sub> NO <sub>8</sub> P | [M-H] <sup>-</sup>                |
| 26  | LNAPE 22:5/N-20:0      | 820.5878    | 6.094           | C <sub>47</sub> H <sub>84</sub> NO <sub>8</sub> P | [M-H] <sup>-</sup>                |
| 27  | LPC 14:0               | 468.308     | 0.961           | C <sub>22</sub> H <sub>46</sub> NO <sub>7</sub> P | [M+H] <sup>+</sup>                |
| 28  | LPC 16:0               | 496.3392    | 1.499           | C <sub>24</sub> H <sub>50</sub> NO <sub>7</sub> P | [M+H] <sup>+</sup>                |
| 29  | LPC 16:1               | 494.3243    | 1.073           | C <sub>24</sub> H <sub>48</sub> NO <sub>7</sub> P | [M+H] <sup>+</sup>                |
| 30  | LPC 18:0               | 524.3702    | 2.323           | C <sub>26</sub> H <sub>54</sub> NO <sub>7</sub> P | [M+H] <sup>+</sup>                |
| 31  | LPC 18:1               | 522.3554    | 1.662           | C <sub>26</sub> H <sub>52</sub> NO <sub>7</sub> P | [M+H] <sup>+</sup>                |
| 32  | LPC 18:2               | 520.3396    | 1.23            | C <sub>26</sub> H <sub>50</sub> NO <sub>7</sub> P | [M+H] <sup>+</sup>                |
| 33  | LPC 18:3               | 518.3256    | 0.997           | C <sub>26</sub> H <sub>48</sub> NO <sub>7</sub> P | [M+H] <sup>+</sup>                |
| 34  | LPC 20:1               | 550.3889    | 2.473           | C <sub>28</sub> H <sub>56</sub> NO <sub>7</sub> P | [M+H] <sup>+</sup>                |
| 35  | LPC 20:4               | 544.3396    | 1.201           | C <sub>28</sub> H <sub>50</sub> NO <sub>7</sub> P | [M+H] <sup>+</sup>                |
| 36  | LPC 22:5               | 570.3541    | 1.479           | C <sub>30</sub> H <sub>52</sub> NO <sub>7</sub> P | [M+H] <sup>+</sup>                |
| 37  | LPC 22:6               | 568.3415    | 1.147           | C <sub>30</sub> H <sub>50</sub> NO <sub>7</sub> P | [M+H] <sup>+</sup>                |
| 38  | LPC O-16:0             | 482.3604    | 1.781           | C <sub>24</sub> H <sub>52</sub> NO <sub>6</sub> P | [M+H] <sup>+</sup>                |
| 39  | LPE 16:0               | 452.2784    | 1.527           | C <sub>21</sub> H <sub>44</sub> NO <sub>7</sub> P | [M-H] <sup>-</sup>                |
| 40  | LPE 18:0               | 480.3106    | 2.376           | C <sub>23</sub> H <sub>48</sub> NO <sub>7</sub> P | [M-H] <sup>-</sup>                |
| 41  | LPE 18:1               | 478.2959    | 1.696           | C <sub>23</sub> H <sub>46</sub> NO <sub>7</sub> P | [M-H] <sup>-</sup>                |
| 42  | LPE 18:2               | 476.2783    | 1.251           | C <sub>23</sub> H <sub>44</sub> NO <sub>7</sub> P | [M-H] <sup>-</sup>                |
| 43  | LPE 20:4               | 500.2808    | 1.221           | C <sub>25</sub> H <sub>44</sub> NO <sub>7</sub> P | [M-H] <sup>-</sup>                |
| 44  | LPE 22:5               | 526.2936    | 1.505           | C <sub>27</sub> H <sub>46</sub> NO <sub>7</sub> P | [M-H] <sup>-</sup>                |
| 45  | LPE 22:6               | 524.2794    | 1.166           | C <sub>27</sub> H <sub>44</sub> NO <sub>7</sub> P | [M-H] <sup>-</sup>                |
| 46  | LPE O-16:1             | 436.2824    | 1.773           | C <sub>21</sub> H <sub>44</sub> NO <sub>6</sub> P | [M-H] <sup>-</sup>                |

|    |                |          |       |                                                   |                       |
|----|----------------|----------|-------|---------------------------------------------------|-----------------------|
| 47 | LPE O-16:2     | 436.2819 | 1.525 | C <sub>21</sub> H <sub>42</sub> NO <sub>6</sub> P | [M+H] <sup>+</sup>    |
| 48 | LPE O-18:0     | 466.3313 | 2.794 | C <sub>23</sub> H <sub>50</sub> NO <sub>6</sub> P | [M-H] <sup>-</sup>    |
| 49 | LPE O-18:1     | 464.3135 | 2.719 | C <sub>23</sub> H <sub>48</sub> NO <sub>6</sub> P | [M-H] <sup>-</sup>    |
| 50 | LPE O-18:2     | 464.3138 | 2.374 | C <sub>23</sub> H <sub>46</sub> NO <sub>6</sub> P | [M+H] <sup>+</sup>    |
| 51 | LPI 18:0       | 599.3221 | 1.558 | C <sub>27</sub> H <sub>53</sub> O <sub>12</sub> P | [M-H] <sup>-</sup>    |
| 52 | PC 16:0/14:0   | 706.5394 | 5.053 | C <sub>38</sub> H <sub>76</sub> NO <sub>8</sub> P | [M+H] <sup>+</sup>    |
| 53 | PC 16:0/16:0   | 734.5698 | 5.703 | C <sub>40</sub> H <sub>80</sub> NO <sub>8</sub> P | [M+H] <sup>+</sup>    |
| 54 | PC 16:0/16:1   | 732.5546 | 5.14  | C <sub>40</sub> H <sub>78</sub> NO <sub>8</sub> P | [M+H] <sup>+</sup>    |
| 55 | PC 14:0/18:2   | 730.5365 | 4.663 | C <sub>40</sub> H <sub>76</sub> NO <sub>8</sub> P | [M+H] <sup>+</sup>    |
| 56 | PC 15:0/18:1   | 746.5671 | 5.45  | C <sub>41</sub> H <sub>80</sub> NO <sub>8</sub> P | [M+H] <sup>+</sup>    |
| 57 | PC 15:0/18:2   | 744.5559 | 4.964 | C <sub>41</sub> H <sub>78</sub> NO <sub>8</sub> P | [M+H] <sup>+</sup>    |
| 58 | PC 16:0/18:1   | 760.5846 | 5.774 | C <sub>42</sub> H <sub>82</sub> NO <sub>8</sub> P | [M+H] <sup>+</sup>    |
| 59 | PC 16:0/18:2   | 758.5681 | 5.277 | C <sub>42</sub> H <sub>80</sub> NO <sub>8</sub> P | [M+H] <sup>+</sup>    |
| 60 | PC 16:0/18:3   | 756.5532 | 4.948 | C <sub>42</sub> H <sub>78</sub> NO <sub>8</sub> P | [M+H] <sup>+</sup>    |
| 61 | PC 16:1/18:2   | 756.5529 | 4.743 | C <sub>42</sub> H <sub>78</sub> NO <sub>8</sub> P | [M+H] <sup>+</sup>    |
| 62 | PC 18:2/16:3   | 752.5203 | 4.414 | C <sub>42</sub> H <sub>74</sub> NO <sub>8</sub> P | [M+H] <sup>+</sup>    |
| 63 | PC 17:0/18:1   | 774.602  | 6.112 | C <sub>43</sub> H <sub>84</sub> NO <sub>8</sub> P | [M+H] <sup>+</sup>    |
| 64 | PC 17:0/18:2   | 772.5865 | 5.597 | C <sub>43</sub> H <sub>82</sub> NO <sub>8</sub> P | [M+H] <sup>+</sup>    |
| 65 | PC 17:1/18:2   | 770.5681 | 5.053 | C <sub>43</sub> H <sub>80</sub> NO <sub>8</sub> P | [M+H] <sup>+</sup>    |
| 66 | PC 18:0/18:1   | 788.6179 | 6.448 | C <sub>44</sub> H <sub>86</sub> NO <sub>8</sub> P | [M+H] <sup>+</sup>    |
| 67 | PC 18:0/18:2   | 786.6011 | 5.931 | C <sub>44</sub> H <sub>84</sub> NO <sub>8</sub> P | [M+H] <sup>+</sup>    |
| 68 | PC 16:0/20:3   | 784.586  | 5.444 | C <sub>44</sub> H <sub>82</sub> NO <sub>8</sub> P | [M+H] <sup>+</sup>    |
| 69 | PC 18:1/18:2   | 784.586  | 5.341 | C <sub>44</sub> H <sub>82</sub> NO <sub>8</sub> P | [M+H] <sup>+</sup>    |
| 70 | PC 16:0/20:4   | 782.5664 | 5.176 | C <sub>44</sub> H <sub>80</sub> NO <sub>8</sub> P | [M+H] <sup>+</sup>    |
| 71 | PC 18:2/18:2   | 782.5666 | 4.869 | C <sub>44</sub> H <sub>80</sub> NO <sub>8</sub> P | [M+H] <sup>+</sup>    |
| 72 | PC 16:1/20:4   | 780.5554 | 4.655 | C <sub>44</sub> H <sub>78</sub> NO <sub>8</sub> P | [M+H] <sup>+</sup>    |
| 73 | PC 19:0/18:1   | 802.6337 | 6.786 | C <sub>45</sub> H <sub>88</sub> NO <sub>8</sub> P | [M+H] <sup>+</sup>    |
| 74 | PC 19:0/18:2   | 800.6171 | 6.268 | C <sub>45</sub> H <sub>86</sub> NO <sub>8</sub> P | [M+H] <sup>+</sup>    |
| 75 | PC 17:0/20:4   | 796.5838 | 5.495 | C <sub>45</sub> H <sub>82</sub> NO <sub>8</sub> P | [M+H] <sup>+</sup>    |
| 76 | PC 20:0/18:1   | 816.65   | 7.127 | C <sub>46</sub> H <sub>90</sub> NO <sub>8</sub> P | [M+H] <sup>+</sup>    |
| 77 | PC 18:0/20:3   | 812.6183 | 6.108 | C <sub>46</sub> H <sub>86</sub> NO <sub>8</sub> P | [M+H] <sup>+</sup>    |
| 78 | PC 16:0/22:4   | 810.6018 | 5.64  | C <sub>46</sub> H <sub>84</sub> NO <sub>8</sub> P | [M+H] <sup>+</sup>    |
| 79 | PC 18:0/20:4   | 810.6017 | 5.817 | C <sub>46</sub> H <sub>84</sub> NO <sub>8</sub> P | [M+H] <sup>+</sup>    |
| 80 | PC 16:0/22:5   | 808.5858 | 5.428 | C <sub>46</sub> H <sub>82</sub> NO <sub>8</sub> P | [M+H] <sup>+</sup>    |
| 81 | PC 18:1/20:4   | 808.5862 | 5.239 | C <sub>46</sub> H <sub>82</sub> NO <sub>8</sub> P | [M+H] <sup>+</sup>    |
| 82 | PC 16:0/22:6   | 806.5718 | 5.02  | C <sub>46</sub> H <sub>80</sub> NO <sub>8</sub> P | [M+H] <sup>+</sup>    |
| 83 | PC 16:1/22:6   | 804.5546 | 4.517 | C <sub>46</sub> H <sub>78</sub> NO <sub>8</sub> P | [M+H] <sup>+</sup>    |
| 84 | PC 18:0/22:4   | 838.6305 | 6.294 | C <sub>48</sub> H <sub>88</sub> NO <sub>8</sub> P | [M+H] <sup>+</sup>    |
| 85 | PC 18:0/22:5   | 836.6191 | 6.083 | C <sub>48</sub> H <sub>86</sub> NO <sub>8</sub> P | [M+H] <sup>+</sup>    |
| 86 | PC 18:0/22:6   | 834.6032 | 5.643 | C <sub>48</sub> H <sub>84</sub> NO <sub>8</sub> P | [M+H] <sup>+</sup>    |
| 87 | PC 18:1/22:5   | 834.6036 | 5.49  | C <sub>48</sub> H <sub>84</sub> NO <sub>8</sub> P | [M+H] <sup>+</sup>    |
| 88 | PC 18:1/22:6   | 832.5877 | 5.069 | C <sub>48</sub> H <sub>82</sub> NO <sub>8</sub> P | [M+H] <sup>+</sup>    |
| 89 | PC O-16:0/16:0 | 764.5853 | 6.137 | C <sub>40</sub> H <sub>82</sub> NO <sub>7</sub> P | [M+HCOO] <sup>-</sup> |
| 90 | PE 16:0/16:1   | 690.5065 | 5.274 | C <sub>37</sub> H <sub>72</sub> NO <sub>8</sub> P | [M+H] <sup>+</sup>    |
| 91 | PE 16:0/18:1   | 718.5402 | 5.921 | C <sub>39</sub> H <sub>76</sub> NO <sub>8</sub> P | [M+H] <sup>+</sup>    |
| 92 | PE 16:0/18:2   | 716.5234 | 5.412 | C <sub>39</sub> H <sub>74</sub> NO <sub>8</sub> P | [M+H] <sup>+</sup>    |
| 93 | PE 16:0/18:3   | 714.5094 | 5.069 | C <sub>39</sub> H <sub>72</sub> NO <sub>8</sub> P | [M+H] <sup>+</sup>    |
| 94 | PE 16:1/18:2   | 712.4933 | 4.872 | C <sub>39</sub> H <sub>72</sub> NO <sub>8</sub> P | [M-H] <sup>-</sup>    |
| 95 | PE 17:0/18:1   | 730.5385 | 6.269 | C <sub>40</sub> H <sub>78</sub> NO <sub>8</sub> P | [M-H] <sup>-</sup>    |

|     |                 |          |       |                                                                 |                    |
|-----|-----------------|----------|-------|-----------------------------------------------------------------|--------------------|
| 96  | PE 17:0/18:2    | 730.5364 | 5.749 | C <sub>40</sub> H <sub>76</sub> NO <sub>8</sub> P               | [M+H] <sup>+</sup> |
| 97  | PE 18:0/18:1    | 746.572  | 6.592 | C <sub>41</sub> H <sub>80</sub> NO <sub>8</sub> P               | [M+H] <sup>+</sup> |
| 98  | PE 18:0/18:2    | 744.5566 | 6.072 | C <sub>41</sub> H <sub>78</sub> NO <sub>8</sub> P               | [M+H] <sup>+</sup> |
| 99  | PE 18:1/18:1    | 742.5385 | 5.395 | C <sub>41</sub> H <sub>78</sub> NO <sub>8</sub> P               | [M-H] <sup>-</sup> |
| 100 | PE 16:0/20:3    | 740.5229 | 5.596 | C <sub>41</sub> H <sub>76</sub> NO <sub>8</sub> P               | [M-H] <sup>-</sup> |
| 101 | PE 18:0/18:3    | 740.5226 | 5.739 | C <sub>41</sub> H <sub>76</sub> NO <sub>8</sub> P               | [M-H] <sup>-</sup> |
| 102 | PE 18:1/18:2    | 742.5371 | 5.476 | C <sub>41</sub> H <sub>76</sub> NO <sub>8</sub> P               | [M+H] <sup>+</sup> |
| 103 | PE 16:0/20:4    | 740.5217 | 5.306 | C <sub>41</sub> H <sub>74</sub> NO <sub>8</sub> P               | [M+H] <sup>+</sup> |
| 104 | PE 18:2/18:2    | 738.5086 | 5.002 | C <sub>41</sub> H <sub>74</sub> NO <sub>8</sub> P               | [M-H] <sup>-</sup> |
| 105 | PE 18:0/20:3    | 770.5678 | 6.246 | C <sub>43</sub> H <sub>80</sub> NO <sub>8</sub> P               | [M+H] <sup>+</sup> |
| 106 | PE 16:0/22:4    | 768.5512 | 5.776 | C <sub>43</sub> H <sub>78</sub> NO <sub>8</sub> P               | [M+H] <sup>+</sup> |
| 107 | PE 18:0/20:4    | 768.5569 | 5.963 | C <sub>43</sub> H <sub>78</sub> NO <sub>8</sub> P               | [M+H] <sup>+</sup> |
| 108 | PE 16:0/22:5    | 766.5362 | 5.567 | C <sub>43</sub> H <sub>76</sub> NO <sub>8</sub> P               | [M+H] <sup>+</sup> |
| 109 | PE 18:1/20:4    | 766.5364 | 5.374 | C <sub>43</sub> H <sub>76</sub> NO <sub>8</sub> P               | [M+H] <sup>+</sup> |
| 110 | PE 16:0/22:6    | 762.5093 | 5.151 | C <sub>43</sub> H <sub>74</sub> NO <sub>8</sub> P               | [M-H] <sup>-</sup> |
| 111 | PE 18:0/22:4    | 796.5837 | 6.437 | C <sub>45</sub> H <sub>82</sub> NO <sub>8</sub> P               | [M+H] <sup>+</sup> |
| 112 | PE 18:0/22:5    | 794.5715 | 6.225 | C <sub>45</sub> H <sub>80</sub> NO <sub>8</sub> P               | [M+H] <sup>+</sup> |
| 113 | PE 18:0/22:6    | 792.5554 | 5.782 | C <sub>45</sub> H <sub>78</sub> NO <sub>8</sub> P               | [M+H] <sup>+</sup> |
| 114 | PE 18:1/22:5    | 790.5393 | 5.644 | C <sub>45</sub> H <sub>78</sub> NO <sub>8</sub> P               | [M-H] <sup>-</sup> |
| 115 | PE 18:1/22:6    | 788.5244 | 5.218 | C <sub>45</sub> H <sub>76</sub> NO <sub>8</sub> P               | [M-H] <sup>-</sup> |
| 116 | PE O-16:0/18:1  | 702.5458 | 6.372 | C <sub>39</sub> H <sub>78</sub> NO <sub>7</sub> P               | [M-H] <sup>-</sup> |
| 117 | PE O-18:1/16:1  | 700.5284 | 6.264 | C <sub>39</sub> H <sub>76</sub> NO <sub>7</sub> P               | [M-H] <sup>-</sup> |
| 118 | PE O-16:1/18:2  | 698.5143 | 5.734 | C <sub>39</sub> H <sub>74</sub> NO <sub>7</sub> P               | [M-H] <sup>-</sup> |
| 119 | PE O-18:0/18:1  | 730.5753 | 7.057 | C <sub>41</sub> H <sub>82</sub> NO <sub>7</sub> P               | [M-H] <sup>-</sup> |
| 120 | PE O-18:0/18:2  | 728.5601 | 6.526 | C <sub>41</sub> H <sub>80</sub> NO <sub>7</sub> P               | [M-H] <sup>-</sup> |
| 121 | PE O-18:1/18:1  | 728.5608 | 6.946 | C <sub>41</sub> H <sub>80</sub> NO <sub>7</sub> P               | [M-H] <sup>-</sup> |
| 122 | PE O-18:1/18:2  | 726.5431 | 6.409 | C <sub>41</sub> H <sub>78</sub> NO <sub>7</sub> P               | [M-H] <sup>-</sup> |
| 123 | PE O-16:0/22:4  | 752.5622 | 6.208 | C <sub>43</sub> H <sub>80</sub> NO <sub>7</sub> P               | [M-H] <sup>-</sup> |
| 124 | PE O-10:0/28:5  | 752.5593 | 5.971 | C <sub>43</sub> H <sub>78</sub> NO <sub>7</sub> P               | [M+H] <sup>+</sup> |
| 125 | PE O-16:0/22:5  | 750.5423 | 5.99  | C <sub>43</sub> H <sub>78</sub> NO <sub>7</sub> P               | [M-H] <sup>-</sup> |
| 126 | PE O-18:1/20:4  | 750.5424 | 6.288 | C <sub>43</sub> H <sub>78</sub> NO <sub>7</sub> P               | [M-H] <sup>-</sup> |
| 127 | PE O-16:1/22:5  | 748.5263 | 5.875 | C <sub>43</sub> H <sub>76</sub> NO <sub>7</sub> P               | [M-H] <sup>-</sup> |
| 128 | PE O-16:1/22:6  | 746.5131 | 5.429 | C <sub>43</sub> H <sub>74</sub> NO <sub>7</sub> P               | [M-H] <sup>-</sup> |
| 129 | PE O-18:0/22:4  | 780.5945 | 6.888 | C <sub>45</sub> H <sub>84</sub> NO <sub>7</sub> P               | [M-H] <sup>-</sup> |
| 130 | PE O-18:0/22:5  | 778.5792 | 6.7   | C <sub>45</sub> H <sub>82</sub> NO <sub>7</sub> P               | [M-H] <sup>-</sup> |
| 131 | PE O-18:1/22:6  | 774.5461 | 6.091 | C <sub>45</sub> H <sub>78</sub> NO <sub>7</sub> P               | [M-H] <sup>-</sup> |
| 132 | PG 19:0/17:0    | 777.5644 | 6.216 | C <sub>42</sub> H <sub>83</sub> O <sub>10</sub> P               | [M-H] <sup>-</sup> |
| 133 | PI 16:0/18:1    | 835.5388 | 4.893 | C <sub>43</sub> H <sub>81</sub> O <sub>13</sub> P               | [M-H] <sup>-</sup> |
| 134 | PI 16:0/18:2    | 833.5197 | 4.474 | C <sub>43</sub> H <sub>79</sub> O <sub>13</sub> P               | [M-H] <sup>-</sup> |
| 135 | PI 18:0/18:1    | 863.5674 | 5.491 | C <sub>45</sub> H <sub>85</sub> O <sub>13</sub> P               | [M-H] <sup>-</sup> |
| 136 | PI 18:0/18:2    | 861.5534 | 5.032 | C <sub>45</sub> H <sub>83</sub> O <sub>13</sub> P               | [M-H] <sup>-</sup> |
| 137 | PI 16:0/20:3    | 859.5336 | 4.623 | C <sub>45</sub> H <sub>81</sub> O <sub>13</sub> P               | [M-H] <sup>-</sup> |
| 138 | PI 16:0/20:4    | 857.5217 | 4.408 | C <sub>45</sub> H <sub>79</sub> O <sub>13</sub> P               | [M-H] <sup>-</sup> |
| 139 | PI 18:0/20:3    | 887.5657 | 5.197 | C <sub>47</sub> H <sub>85</sub> O <sub>13</sub> P               | [M-H] <sup>-</sup> |
| 140 | PI 18:0/20:4    | 885.553  | 4.96  | C <sub>47</sub> H <sub>83</sub> O <sub>13</sub> P               | [M-H] <sup>-</sup> |
| 141 | PI 18:0/22:5    | 911.5714 | 5.195 | C <sub>49</sub> H <sub>85</sub> O <sub>13</sub> P               | [M-H] <sup>-</sup> |
| 142 | SHexCer 35:2;3O | 806.4961 | 5.324 | C <sub>41</sub> H <sub>77</sub> NO <sub>12</sub> S              | [M-H] <sup>-</sup> |
| 143 | SHexCer 37:2;3O | 834.5292 | 5.981 | C <sub>43</sub> H <sub>81</sub> NO <sub>12</sub> S              | [M-H] <sup>-</sup> |
| 144 | SM 34:0;2O      | 705.5927 | 5.198 | C <sub>39</sub> H <sub>81</sub> N <sub>2</sub> O <sub>6</sub> P | [M+H] <sup>+</sup> |



|     |                   |          |        |                                                                 |                                   |
|-----|-------------------|----------|--------|-----------------------------------------------------------------|-----------------------------------|
| 145 | SM 18:1;2O/16:0   | 703.5749 | 4.964  | C <sub>39</sub> H <sub>79</sub> N <sub>2</sub> O <sub>6</sub> P | [M+H] <sup>+</sup>                |
| 146 | SM 18:1;2O/18:0   | 731.6082 | 5.638  | C <sub>41</sub> H <sub>83</sub> N <sub>2</sub> O <sub>6</sub> P | [M+H] <sup>+</sup>                |
| 147 | SM 18:1;2O/18:1   | 729.5884 | 5.066  | C <sub>41</sub> H <sub>81</sub> N <sub>2</sub> O <sub>6</sub> P | [M+H] <sup>+</sup>                |
| 148 | SM 36:3;2O        | 727.5747 | 4.595  | C <sub>41</sub> H <sub>79</sub> N <sub>2</sub> O <sub>6</sub> P | [M+H] <sup>+</sup>                |
| 149 | SM 18:1;2O/22:0   | 787.6684 | 7.027  | C <sub>45</sub> H <sub>91</sub> N <sub>2</sub> O <sub>6</sub> P | [M+H] <sup>+</sup>                |
| 150 | SM 18:1;2O/24:1   | 813.6831 | 6.997  | C <sub>47</sub> H <sub>93</sub> N <sub>2</sub> O <sub>6</sub> P | [M+H] <sup>+</sup>                |
| 151 | ST 24:1;O3;T      | 498.289  | 0.47   | C <sub>26</sub> H <sub>45</sub> NO <sub>6</sub> S               | [M-H] <sup>-</sup>                |
| 152 | ST 27:1;O;S       | 465.3039 | 3.093  | C <sub>27</sub> H <sub>46</sub> O <sub>4</sub> S                | [M-H] <sup>-</sup>                |
| 153 | TG 14:0_16:0_16:1 | 794.7224 | 10.239 | C <sub>49</sub> H <sub>92</sub> O <sub>6</sub>                  | [M+NH <sub>4</sub> ] <sup>+</sup> |
| 154 | TG 16:0_14:1_16:1 | 792.7048 | 9.779  | C <sub>49</sub> H <sub>90</sub> O <sub>6</sub>                  | [M+NH <sub>4</sub> ] <sup>+</sup> |
| 155 | TG 14:0_16:0_18:0 | 824.7687 | 11.02  | C <sub>51</sub> H <sub>98</sub> O <sub>6</sub>                  | [M+NH <sub>4</sub> ] <sup>+</sup> |
| 156 | TG 14:0_16:0_18:1 | 822.7533 | 10.692 | C <sub>51</sub> H <sub>96</sub> O <sub>6</sub>                  | [M+NH <sub>4</sub> ] <sup>+</sup> |
| 157 | TG 16:0_14:1_18:1 | 820.7364 | 10.263 | C <sub>51</sub> H <sub>94</sub> O <sub>6</sub>                  | [M+NH <sub>4</sub> ] <sup>+</sup> |
| 158 | TG 16:0_14:1_18:2 | 818.7268 | 9.846  | C <sub>51</sub> H <sub>92</sub> O <sub>6</sub>                  | [M+NH <sub>4</sub> ] <sup>+</sup> |
| 159 | TG 15:0_16:0_18:1 | 841.7272 | 10.901 | C <sub>52</sub> H <sub>98</sub> O <sub>6</sub>                  | [M+Na] <sup>+</sup>               |
| 160 | TG 15:0_16:1_18:1 | 839.7066 | 10.487 | C <sub>52</sub> H <sub>96</sub> O <sub>6</sub>                  | [M+Na] <sup>+</sup>               |
| 161 | TG 16:0_16:0_18:0 | 852.8001 | 11.408 | C <sub>53</sub> H <sub>102</sub> O <sub>6</sub>                 | [M+NH <sub>4</sub> ] <sup>+</sup> |
| 162 | TG 16:0_16:0_18:1 | 850.7844 | 11.022 | C <sub>53</sub> H <sub>100</sub> O <sub>6</sub>                 | [M+NH <sub>4</sub> ] <sup>+</sup> |
| 163 | TG 16:0_16:1_18:1 | 848.772  | 10.705 | C <sub>53</sub> H <sub>98</sub> O <sub>6</sub>                  | [M+NH <sub>4</sub> ] <sup>+</sup> |
| 164 | TG 16:0_16:0_18:3 | 851.7046 | 10.39  | C <sub>53</sub> H <sub>96</sub> O <sub>6</sub>                  | [M+Na] <sup>+</sup>               |
| 165 | TG 16:0_16:1_18:2 | 846.7498 | 10.238 | C <sub>53</sub> H <sub>96</sub> O <sub>6</sub>                  | [M+NH <sub>4</sub> ] <sup>+</sup> |
| 166 | TG 16:0_16:1_18:3 | 849.6956 | 10.023 | C <sub>53</sub> H <sub>94</sub> O <sub>6</sub>                  | [M+Na] <sup>+</sup>               |
| 167 | TG 16:1_16:1_18:2 | 844.738  | 9.869  | C <sub>53</sub> H <sub>94</sub> O <sub>6</sub>                  | [M+NH <sub>4</sub> ] <sup>+</sup> |
| 168 | TG 16:0_17:0_18:1 | 864.8044 | 11.309 | C <sub>54</sub> H <sub>102</sub> O <sub>6</sub>                 | [M+NH <sub>4</sub> ] <sup>+</sup> |
| 169 | TG 16:0_17:1_18:1 | 862.7853 | 10.832 | C <sub>54</sub> H <sub>100</sub> O <sub>6</sub>                 | [M+NH <sub>4</sub> ] <sup>+</sup> |
| 170 | TG 15:0_18:1_18:2 | 860.7682 | 10.464 | C <sub>54</sub> H <sub>98</sub> O <sub>6</sub>                  | [M+NH <sub>4</sub> ] <sup>+</sup> |
| 171 | TG 16:0_18:0_18:1 | 878.8129 | 11.411 | C <sub>55</sub> H <sub>104</sub> O <sub>6</sub>                 | [M+NH <sub>4</sub> ] <sup>+</sup> |
| 172 | TG 16:0_18:1_18:1 | 876.7953 | 11.031 | C <sub>55</sub> H <sub>102</sub> O <sub>6</sub>                 | [M+NH <sub>4</sub> ] <sup>+</sup> |
| 173 | TG 16:0_18:1_18:2 | 874.7846 | 10.678 | C <sub>55</sub> H <sub>100</sub> O <sub>6</sub>                 | [M+NH <sub>4</sub> ] <sup>+</sup> |
| 174 | TG 16:0_18:1_18:3 | 872.7708 | 10.486 | C <sub>55</sub> H <sub>98</sub> O <sub>6</sub>                  | [M+NH <sub>4</sub> ] <sup>+</sup> |
| 175 | TG 16:1_18:1_18:2 | 872.7682 | 10.291 | C <sub>55</sub> H <sub>98</sub> O <sub>6</sub>                  | [M+NH <sub>4</sub> ] <sup>+</sup> |
| 176 | TG 16:0_18:2_18:3 | 870.7525 | 10.005 | C <sub>55</sub> H <sub>96</sub> O <sub>6</sub>                  | [M+NH <sub>4</sub> ] <sup>+</sup> |
| 177 | TG 16:1_18:1_18:3 | 870.7512 | 9.892  | C <sub>55</sub> H <sub>96</sub> O <sub>6</sub>                  | [M+NH <sub>4</sub> ] <sup>+</sup> |
| 178 | TG 16:1_18:2_18:3 | 873.6916 | 9.56   | C <sub>55</sub> H <sub>94</sub> O <sub>6</sub>                  | [M+Na] <sup>+</sup>               |
| 179 | TG 17:0_17:0_19:1 | 892.8315 | 11.503 | C <sub>56</sub> H <sub>106</sub> O <sub>6</sub>                 | [M+NH <sub>4</sub> ] <sup>+</sup> |
| 180 | TG 17:0_18:1_18:1 | 890.8141 | 11.23  | C <sub>56</sub> H <sub>104</sub> O <sub>6</sub>                 | [M+NH <sub>4</sub> ] <sup>+</sup> |
| 181 | TG 17:0_18:1_18:2 | 888.7979 | 10.877 | C <sub>56</sub> H <sub>102</sub> O <sub>6</sub>                 | [M+NH <sub>4</sub> ] <sup>+</sup> |
| 182 | TG 17:1_18:1_18:2 | 886.7839 | 10.574 | C <sub>56</sub> H <sub>100</sub> O <sub>6</sub>                 | [M+NH <sub>4</sub> ] <sup>+</sup> |
| 183 | TG 18:0_18:0_18:1 | 906.8482 | 11.769 | C <sub>57</sub> H <sub>108</sub> O <sub>6</sub>                 | [M+NH <sub>4</sub> ] <sup>+</sup> |
| 184 | TG 18:0_18:1_18:1 | 904.8279 | 11.418 | C <sub>57</sub> H <sub>106</sub> O <sub>6</sub>                 | [M+NH <sub>4</sub> ] <sup>+</sup> |
| 185 | TG 18:0_18:1_18:2 | 907.7728 | 11.156 | C <sub>57</sub> H <sub>104</sub> O <sub>6</sub>                 | [M+Na] <sup>+</sup>               |
| 186 | TG 18:1_18:1_18:1 | 902.8151 | 11.05  | C <sub>57</sub> H <sub>104</sub> O <sub>6</sub>                 | [M+NH <sub>4</sub> ] <sup>+</sup> |
| 187 | TG 18:1_18:1_18:2 | 900.8016 | 10.693 | C <sub>57</sub> H <sub>102</sub> O <sub>6</sub>                 | [M+NH <sub>4</sub> ] <sup>+</sup> |
| 188 | TG 16:0_18:1_20:4 | 898.7803 | 10.555 | C <sub>57</sub> H <sub>100</sub> O <sub>6</sub>                 | [M+NH <sub>4</sub> ] <sup>+</sup> |
| 189 | TG 18:1_18:2_18:2 | 898.7889 | 10.406 | C <sub>57</sub> H <sub>100</sub> O <sub>6</sub>                 | [M+NH <sub>4</sub> ] <sup>+</sup> |
| 190 | TG 16:0_18:2_20:4 | 896.7664 | 10.25  | C <sub>57</sub> H <sub>98</sub> O <sub>6</sub>                  | [M+NH <sub>4</sub> ] <sup>+</sup> |
| 191 | TG 18:1_18:2_18:3 | 896.7656 | 9.971  | C <sub>57</sub> H <sub>98</sub> O <sub>6</sub>                  | [M+NH <sub>4</sub> ] <sup>+</sup> |
| 192 | TG 18:1_18:1_20:1 | 930.85   | 11.497 | C <sub>59</sub> H <sub>108</sub> O <sub>6</sub>                 | [M+NH <sub>4</sub> ] <sup>+</sup> |
| 193 | TG 16:0_18:0_22:4 | 933.7924 | 11.322 | C <sub>59</sub> H <sub>106</sub> O <sub>6</sub>                 | [M+Na] <sup>+</sup>               |

|     |                     |          |        |                                                 |                                   |
|-----|---------------------|----------|--------|-------------------------------------------------|-----------------------------------|
| 194 | TG 18:0_18:1_20:3   | 933.782  | 11.176 | C <sub>59</sub> H <sub>106</sub> O <sub>6</sub> | [M+Na] <sup>+</sup>               |
| 195 | TG 16:0_18:1_22:4   | 926.8231 | 10.856 | C <sub>59</sub> H <sub>104</sub> O <sub>6</sub> | [M+NH <sub>4</sub> ] <sup>+</sup> |
| 196 | TG 18:0_18:1_20:4   | 926.8137 | 10.983 | C <sub>59</sub> H <sub>104</sub> O <sub>6</sub> | [M+NH <sub>4</sub> ] <sup>+</sup> |
| 197 | TG 18:1_18:2_20:2   | 931.7709 | 10.782 | C <sub>59</sub> H <sub>104</sub> O <sub>6</sub> | [M+Na] <sup>+</sup>               |
| 198 | TG 16:0_18:1_22:5   | 924.8022 | 10.549 | C <sub>59</sub> H <sub>102</sub> O <sub>6</sub> | [M+NH <sub>4</sub> ] <sup>+</sup> |
| 199 | TG 16:0_18:1_22:6   | 922.7831 | 10.389 | C <sub>59</sub> H <sub>100</sub> O <sub>6</sub> | [M+NH <sub>4</sub> ] <sup>+</sup> |
| 200 | TG 18:1_18:2_20:4   | 922.7849 | 10.264 | C <sub>59</sub> H <sub>100</sub> O <sub>6</sub> | [M+NH <sub>4</sub> ] <sup>+</sup> |
| 201 | TG O-18:0_18:1_18:1 | 890.8362 | 11.229 | C <sub>57</sub> H <sub>108</sub> O <sub>5</sub> | [M+NH <sub>4</sub> ] <sup>+</sup> |
